# Supplementary material for: Heterostructured Sn/SnO2−x nanotube peapods with a strong plasmonic effect for photoelectrochemical water oxidation
Source: Royal Society of Chemistry journal article supplement (doi:10.1039/c9ta03848e), 2019-01-01
Supplement: c9ta03848e1.pdf [file c9ta03848e1.pdf]

## Supporting Information for

# Heterostructured Sn/SnO<sub>2-x</sub> Nanotube Peapod with Strong Plasmonic Effect for Photoelectrochemical Water Oxidation

Yueying Li,<sup>a</sup> Jian-Gan Wang,<sup>a,\*</sup> Wei Hua,<sup>a</sup> Huanyan Liu,<sup>a</sup> and Bingqing Wei<sup>a, b, \*</sup>

<sup>a</sup> State Key Laboratory of Solidification Processing, Center for Nano Energy Materials, School of Materials Science and Engineering, Northwestern Polytechnical University and Shaanxi Joint Lab of Graphene (NPU), Xi'an 710072, China

<sup>b</sup> Department of Mechanical Engineering, University of Delaware, Newark, DE19716, USA

E-mail: [wangjiangan@nwpu.edu.cn](mailto:wangjiangan@nwpu.edu.cn) (J.G. Wang); [weib@udel.edu](mailto:weib@udel.edu) (B. Wei)

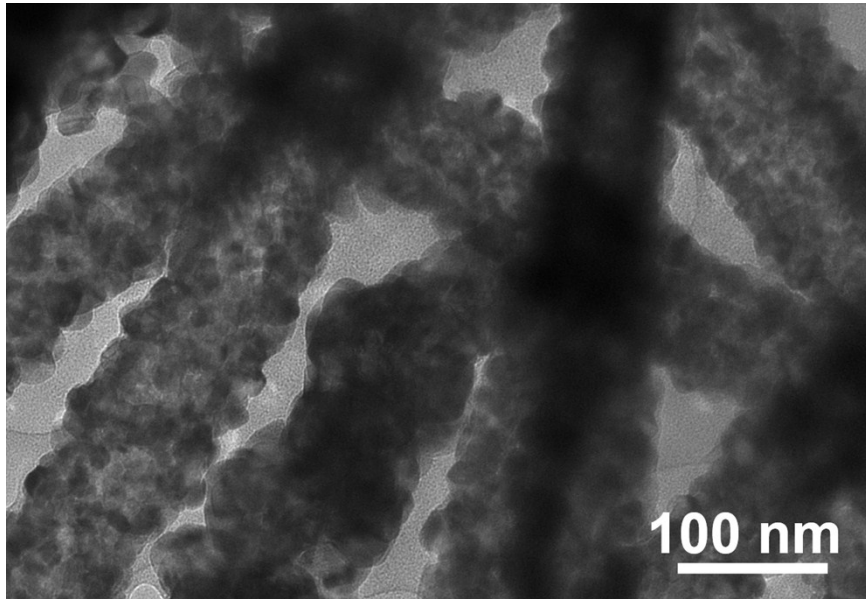

**Fig. S1** TEM image of pristine SnO<sub>2</sub>.

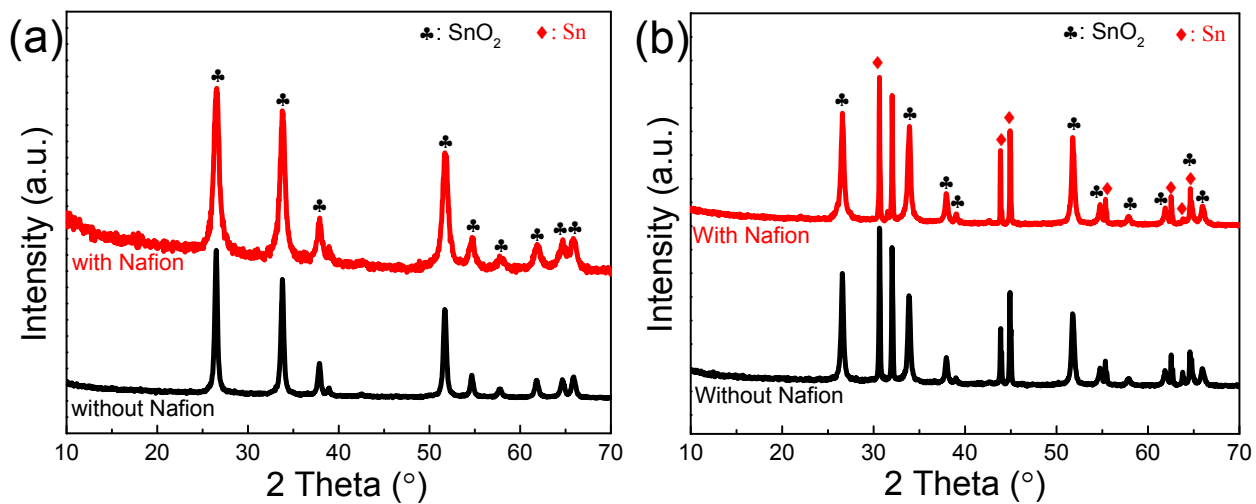

**Fig. S2** XRD patterns of samples with and without Nafion binder for (a)  $\text{SnO}_2$ , and (b)  $\text{Sn/SnO}_{2-x}$ .

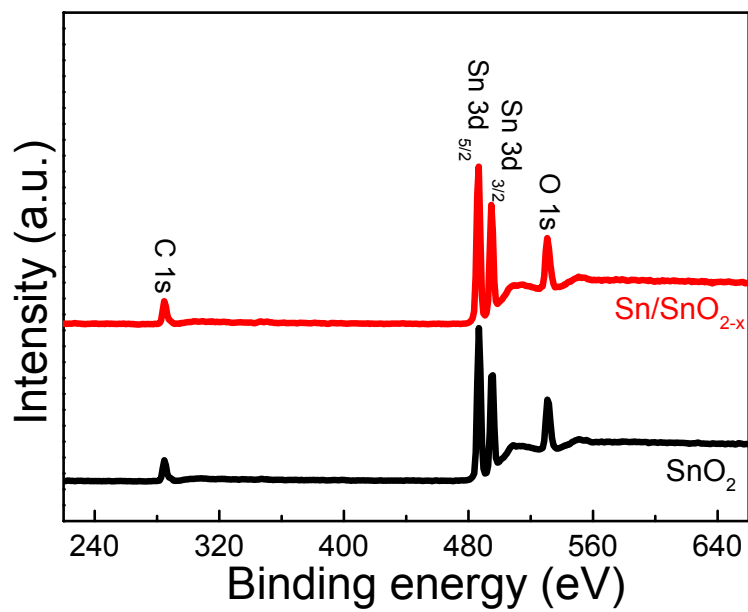

**Fig. S3** XPS survey spectra of SnO<sub>2</sub> and Sn/SnO<sub>2-x</sub>.

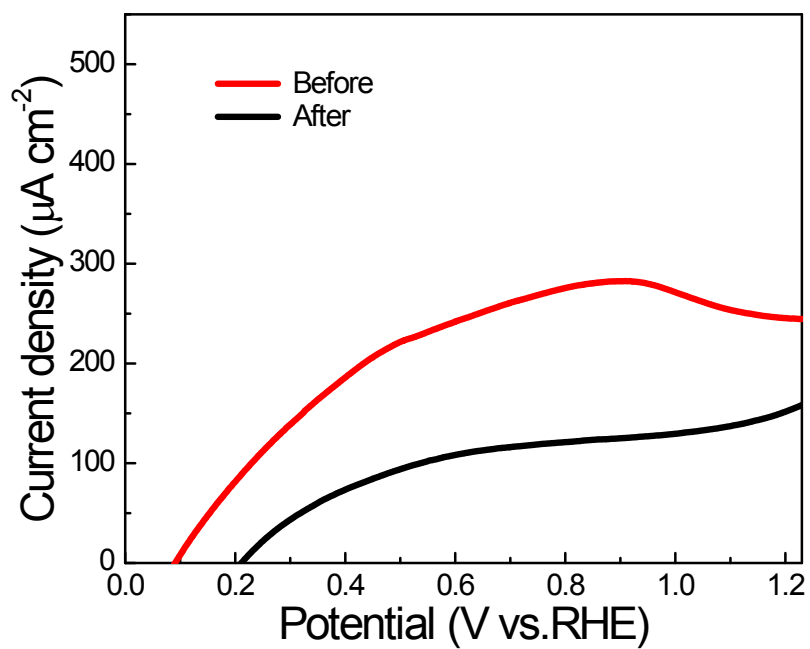

**Fig. S4** LSV curves of Sn/SnO<sub>2-x</sub> before and after stability test.
